# Supplementary material for: The accumulation rate of tau aggregates is higher in females and younger amyloid-positive subjects
Source: PubMed Central journal article supplement — Brain. 2020 Dec 1;143(12):3805–15. doi: 10.1093/brain/awaa327 (PMC7805812; doi:10.1093/brain/awaa327), 2020-12-01
Supplement: awaa327_supplementary_data.pdf [file awaa327_supplementary_data.pdf]

## SUPPLEMENT

### Table of contents

#### Supplementary Methods

Generation of an off-target ROI page 2

#### Supplementary Tables

Supplementary Table 1. Clinical characteristics of participants in the four subcohorts  
page 3

Supplementary Table 2. Between cohort comparisons page 4

Supplementary Table 3. Distribution of *APOE*  $\epsilon$ 4-genotype in males and females  
page 5

Supplementary Table 4. Demographics for young participants (< 65 years)  
page 6

Supplementary Table 5. Cohort characteristics and the rate of A $\beta$  accumulation in ADNI  
page 7

Supplementary Table 6. Results of linear models for Tau-accumulation, PVE-corrected  
page 8

Supplementary Table 7. Results of linear model for Tau-accumulation in  
skull/meningeal “off-target ROI” page 9

Supplementary Table 8. Results of linear model for Tau-accumulation in basal ganglia,  
putamen and globus palidus page 10

Supplementary Table 9. Results of linear model for Tau-accumulation in amygdala and  
precuneus/posterior cingulate ROIs page 11

Supplementary Table 10. Results of linear model for A $\beta$  accumulation in ADNI  
page 12

#### Supplementary Figures

Supplementary Figure 1 - Baseline <sup>18</sup>F-Flortaucipir SUVRs. page 13

Supplementary Figure 2 - <sup>18</sup>F-Flortaucipir slopes, full range y-axes.  
page 14

Supplementary Figure 3 - Creating an off-target ROI for skull/meninges.

page 15

Supplementary Figure 4 - <sup>18</sup>F-Flortaucipir slopes in off-target ROI. page 16

## **SUPPLEMENTARY METHODS**

### *Generation of an off-target ROI*

The mask for extracting off-target binding outside the FreeSurfer segmented gray matter was constructed via a series of morphological filters. First, the FreeSurfer Grey Matter, White Matter and Cerebrospinal Fluid ROIs were merged and dilated 5 mm (to approximate PET resolution), followed by a fill-hole operation. Eroding 5 mm again and removing the resulting mask voxels from the dilated mask yielded the exterior region used to probe the off-target signal. To compensate for true cortical signal in the off-target ROI dividing the off-target ROI mean SUVR by that of the interior mask yielded a more accurate measure in identifying subjects with primarily artefactual uptake. Dilating and then eroding causes the deep sulci to be excluded from the exterior region.

## SUPPLEMENTARY TABLES

**Supplementary Table 1. Clinical characteristics of participants in the four subcohorts**

| <b>ADNI</b>                       | <b>A<math>\beta</math>- CU</b> | <b>A<math>\beta</math>- MCI</b> | <b>A<math>\beta</math>+ CU</b> | <b>A<math>\beta</math>+ MCI</b> | <b>AD</b>       | <b>p-value</b>               |
|-----------------------------------|--------------------------------|---------------------------------|--------------------------------|---------------------------------|-----------------|------------------------------|
| Number (n=123)                    | 21                             | 23                              | 46                             | 32                              | 1               |                              |
| Age $\pm$ SD                      | 76.0 $\pm$ 6.5                 | 74.2 $\pm$ 7.0                  | 78.8 $\pm$ 6.8                 | 75.4 $\pm$ 7.0                  | 56.2            | d*, i*, j*                   |
| Sex (F/M)                         | 12/9                           | 9/14                            | 25/21                          | 14/18                           | 0/1             | n.s.                         |
| Education $\pm$ SD                | 16.6 $\pm$ 2.1                 | 16.4 $\pm$ 2.9                  | 16.8 $\pm$ 2.3                 | 16.3 $\pm$ 2.7                  | 13              | n.s.                         |
| MMSE $\pm$ SD                     | 29.3 $\pm$ 1.1                 | 28.0 $\pm$ 3.1                  | 28.0 $\pm$ 2.4                 | 26.9 $\pm$ 3.2                  | 21              | c*, d*                       |
| APOE $\epsilon$ 4-alleles (0/1/2) | 16/5/0                         | 20/3/0                          | 25/18/3                        | 11/15/6                         | 1/0/0           | c**, e**, f**, h*            |
|                                   |                                |                                 |                                |                                 |                 |                              |
| <b>AVID</b>                       | <b>A<math>\beta</math>- CU</b> | <b>A<math>\beta</math>- MCI</b> | <b>A<math>\beta</math>+ CU</b> | <b>A<math>\beta</math>+ MCI</b> | <b>AD</b>       | <b>p-value</b>               |
| Number (n=157)                    | 51                             | 35                              | 3                              | 42                              | 26              |                              |
| Age $\pm$ SD                      | 68.0 $\pm$ 10.4                | 69.6 $\pm$ 10.0                 | 79.7 $\pm$ 2.1                 | 72.1 $\pm$ 8.3                  | 74.8 $\pm$ 10.2 | d*                           |
| Sex (F/M)                         | 23/28                          | 17/18                           | 1/2                            | 19/23                           | 15/11           | n.s.                         |
| Education $\pm$ SD                | 15.7 $\pm$ 2.0                 | 15.1 $\pm$ 3.1                  | 14.7 $\pm$ 2.3                 | 16.3 $\pm$ 2.8                  | 15.2 $\pm$ 2.9  | n.s.                         |
| MMSE $\pm$ SD                     | 29.5 $\pm$ 0.5                 | 28.4 $\pm$ 1.7                  | 29.3 $\pm$ 0.6                 | 27.5 $\pm$ 1.9                  | 21.6 $\pm$ 3.9  | c***, d***, g***, i***, j*** |
| APOE $\epsilon$ 4-alleles (0/1/2) | 38/9/1                         | 22/10/1                         | 2/1/0                          | 18/15/7                         | 7/13/6          | c***, d***, f*, g**          |
|                                   |                                |                                 |                                |                                 |                 |                              |
| <b>Expedition 3</b>               | <b>A<math>\beta</math>- CU</b> | <b>A<math>\beta</math>- MCI</b> | <b>A<math>\beta</math>+ CU</b> | <b>A<math>\beta</math>+ MCI</b> | <b>AD</b>       | <b>p-value</b>               |
| Number (n=82)                     | 0                              | 0                               | 0                              | 0                               | 82              | N/A                          |
| Age $\pm$ SD                      | -                              | -                               | -                              | -                               | 73.3 $\pm$ 8.4  | N/A                          |
| Sex (F/M)                         | -                              | -                               | -                              | -                               | 45/37           | N/A                          |
| Education $\pm$ SD                | -                              | -                               | -                              | -                               | 14.2 $\pm$ 3.2  | N/A                          |
| MMSE $\pm$ SD                     | -                              | -                               | -                              | -                               | 23.1 $\pm$ 1.7  | N/A                          |
| APOE $\epsilon$ 4-alleles (0/1/2) | -                              | -                               | -                              | -                               | 23/42/15        | N/A                          |
|                                   |                                |                                 |                                |                                 |                 |                              |
| <b>BioFINDER (n=57)</b>           | <b>A<math>\beta</math>- CU</b> | <b>A<math>\beta</math>- MCI</b> | <b>A<math>\beta</math>+ CU</b> | <b>A<math>\beta</math>+ MCI</b> | <b>AD</b>       | <b>p-value</b>               |
| Number                            | 16                             | 0                               | 16                             | 7                               | 18              |                              |
| Age $\pm$ SD                      | 74.6 $\pm$ 4.3                 | -                               | 74.8 $\pm$ 6.9                 | 72.7 $\pm$ 6.6                  | 69.8 $\pm$ 10.5 | n.s.                         |
| Sex (F/M)                         | 5/11                           | -                               | 11/5                           | 5/2                             | 7/11            | n.s.                         |
| Education $\pm$ SD                | 12.5 $\pm$ 4.1                 | -                               | 10.6 $\pm$ 3.2                 | 11.1 $\pm$ 2.7                  | 13.5 $\pm$ 3.3  | n.s.                         |
| MMSE $\pm$ SD                     | 29.2 $\pm$ 0.9                 | -                               | 29.1 $\pm$ 1.2                 | 25.6 $\pm$ 2.9                  | 22.1 $\pm$ 5.2  | d***, j***                   |
| APOE $\epsilon$ 4-alleles (0/1/2) | 16/0/0                         | -                               | 6/9/1                          | 3/3/1                           | 7/7/4           | b***, c**, d***              |
|                                   |                                |                                 |                                |                                 |                 |                              |

**Table legend.** Statistical comparisons between <sup>a</sup> A $\beta$ - CU and A $\beta$ - MCI; <sup>b</sup> A $\beta$ - CU and A $\beta$ + CU; <sup>c</sup> A $\beta$ - CU and A $\beta$ + MCI; <sup>d</sup> A $\beta$ - CU and AD; <sup>e</sup> A $\beta$ - MCI and A $\beta$ + CU; <sup>f</sup> A $\beta$ - MCI and A $\beta$ + MCI; <sup>g</sup> A $\beta$ - MCI and AD; <sup>h</sup> A $\beta$ + CU and A $\beta$ + MCI; <sup>i</sup> A $\beta$ + CU and AD; <sup>j</sup> A $\beta$ + MCI and AD. \* p < 0.05; \*\* p < 0.01; \*\*\* p < 0.001. A $\beta$ -  $\beta$  amyloid negative; A $\beta$ +  $\beta$  amyloid positive; AD – Alzheimer’s Disease dementia; CU – cognitively unimpaired; F – female; M – male; MCI – mild cognitive impairment; SD – standard deviation.

## Supplementary Table 2. Between cohort comparisons

|                                   | ADNI           | AVID           | Expedition 3   | BioFINDER      | p-value                         |
|-----------------------------------|----------------|----------------|----------------|----------------|---------------------------------|
| Number                            | 123            | 157            | 82             | 57             |                                 |
| Age $\pm$ SD                      | 76.4 $\pm$ 7.2 | 70.7 $\pm$ 9.9 | 73.3 $\pm$ 8.4 | 72.9 $\pm$ 7.8 | a***                            |
| Sex (F/M)                         | 60/63          | 76/81          | 45/37          | 28/29          | n.s.                            |
| Education $\pm$ SD                | 16.5 $\pm$ 2.5 | 15.6 $\pm$ 2.6 | 14.2 $\pm$ 3.2 | 12.1 $\pm$ 3.6 | a*, b***, c***, d**, e***, f*** |
| MMSE $\pm$ SD                     | 27.9 $\pm$ 2.8 | 27.4 $\pm$ 3.4 | 23.1 $\pm$ 1.7 | 26.5 $\pm$ 4.5 | a*, b***, c***, d**, e***, f*** |
| APOE $\epsilon$ 4-alleles (0/1/2) | 73/41/9        | 87/48/15       | 23/42/15       | 32/19/6        | b***, d***, f**                 |

**Table legend.** Statistical comparisons between <sup>a</sup> ADNI and AVID; <sup>b</sup> ADNI and Expedition 3; <sup>c</sup> ADNI and BioFINDER; <sup>d</sup> AVID and Expedition 3; <sup>e</sup> AVID and BioFINDER; <sup>f</sup> Expedition 3 and BioFINDER. \* p < 0.05; \*\* p < 0.01; \*\*\* p < 0.001. F – female; M – male; SD – standard deviation.

**Supplementary Table 3. Distribution of *APOE*  $\epsilon$ 4-genotype in males and females**

|         | Number with available data | No <i>APOE</i> $\epsilon$ 4 allele | One <i>APOE</i> $\epsilon$ 4 allele | Two <i>APOE</i> $\epsilon$ 4 allele |
|---------|----------------------------|------------------------------------|-------------------------------------|-------------------------------------|
| Males   | 210                        | 118                                | 69                                  | 20                                  |
| Females | 207                        | 97                                 | 81                                  | 25                                  |

Kruskal-Wallis test  $p = 0.09$

**Supplementary Table 4. Demographics for young participants (< 65 years)**

|                                                                     | A $\beta$ - CU                               | A $\beta$ - MCI                         | A $\beta$ + CU                          | A $\beta$ + MCI                            | AD                                      |
|---------------------------------------------------------------------|----------------------------------------------|-----------------------------------------|-----------------------------------------|--------------------------------------------|-----------------------------------------|
| Number (n=69)                                                       | 20                                           | 13                                      | 3                                       | 11                                         | 22                                      |
| Age $\pm$ SD<br>[median (IQR)]                                      | 57.2 $\pm$ 4.3<br>[57.5<br>(7.25)]           | 58.7 $\pm$ 3.9<br>[59 (5)]              | 62.2 $\pm$ 1.3<br>[62 (1.25)]           | 60.2 $\pm$ 4.3<br>[62 (3.5)]               | 58.3 $\pm$ 5.7<br>[59.1 (6.3)]          |
| Sex (F/M)                                                           | 7/13                                         | 10/3                                    | 3/0                                     | 9/2                                        | 14/8                                    |
| Education $\pm$ SD<br>[median (IQR)]                                | 14.8 $\pm$ 1.8<br>[16 (3.25)]                | 14.5 $\pm$ 3.1<br>[14 (6)]              | 12.3 $\pm$ 3.5<br>[12 (3.5)]            | 15.8 $\pm$ 1.9<br>[16 (0.5)]               | 14.8 $\pm$ 3.5<br>[15 (4)]              |
| MMSE $\pm$ SD<br>[median (IQR)]                                     | 29.5 $\pm$ 0.5<br>[29.5 (1)]                 | 28.1 $\pm$ 1.8<br>[29 (2)]              | 29.0 $\pm$ 1.7<br>[30 (1.5)]            | 27.2 $\pm$ 2.5<br>[28 (2)]                 | 22.2 $\pm$ 3.7<br>[23 (2.5)]            |
| APOE $\epsilon$ 4-alleles<br>(0/1/2)                                | 14/4/1                                       | 5/7/0                                   | 1/2/0                                   | 4/4/3                                      | 8/8/5 <sup>o</sup>                      |
| <i>Baseline tau</i>                                                 |                                              |                                         |                                         |                                            |                                         |
| Temporal meta-ROI<br>SUVR (mean $\pm$ SD )<br>[median (IQR)]        | 1.12 $\pm$ 0.08<br>[1.11<br>(0.08)]          | 1.09 $\pm$ 0.07<br>[1.07 (0.04)]        | 1.17 $\pm$ 0.09<br>[1.16 (0.09)]        | 1.66 $\pm$ 0.48<br>[1.39<br>(0.91)]        | 1.93 $\pm$ 0.36<br>[2.0 (0.48)]         |
| Neocortical ROI<br>SUVR (mean $\pm$ SD )<br>[median (IQR)]          | 1.06 $\pm$ 0.09<br>[1.06<br>(0.12)]          | 1.0 $\pm$ 0.05<br>[1.0 (0.06)]          | 1.10 $\pm$ 0.09<br>[1.06 (0.08)]        | 1.44 $\pm$ 0.37<br>[1.31<br>(0.68)]        | 1.67 $\pm$ 0.36<br>[1.77 (0.44)]        |
| <i>Tau slopes</i>                                                   |                                              |                                         |                                         |                                            |                                         |
| Temporal meta-ROI<br>(SUVR/year) mean $\pm$<br>SD<br>[median (IQR)] | -0.002 $\pm$<br>0.023<br>[-0.002<br>(0.027)] | 0.001 $\pm$ 0.022<br>[0.006<br>(0.034)] | 0.021 $\pm$ 0.012<br>[0.017<br>(0.012)] | 0.136<br>$\pm$ 0.169<br>[0.133<br>(0.153)] | 0.085 $\pm$ 0.204<br>[0.059<br>(0.134)] |
| Neocortical ROI<br>(SUVR/year) mean $\pm$<br>SD<br>[median (IQR)]   | 0.001<br>$\pm$ 0.022<br>[0.001<br>(0.019)]   | 0.004 $\pm$ 0.037<br>[0.013<br>(0.035)] | 0.040 $\pm$ 0.054<br>[0.017<br>(0.050)] | 0.098<br>$\pm$ 0.146<br>[0.076<br>(0.160)] | 0.062 $\pm$ 0.158<br>[0.031<br>(0.126)] |

**Table legend.** A $\beta$ - - $\beta$  amyloid negative; A $\beta$ + - $\beta$  amyloid positive; AD – Alzheimer’s Disease dementia; CU – cognitively unimpaired; F – female; M – male; MCI – mild cognitive impairment; SD – standard deviation. <sup>o</sup> One individual with missing data.

**Supplementary Table 5. Cohort characteristics and the rate of A $\beta$  accumulation in ADNI.**

| ADNI                               | A $\beta$ - CU      | A $\beta$ - MCI     | A $\beta$ + CU      | A $\beta$ + MCI     | AD                  | p-value                                            |
|------------------------------------|---------------------|---------------------|---------------------|---------------------|---------------------|----------------------------------------------------|
| Number                             | 155                 | 145                 | 101                 | 204                 | 34                  |                                                    |
| Age                                | 73.5 $\pm$ 6.5      | 70.6 $\pm$ 8.0      | 74.8 $\pm$ 6.5      | 72.3 $\pm$ 7.0      | 75.4 $\pm$ 7.1      | a**, e***, g**, h*                                 |
| Sex (F/M)                          | 67/88               | 66/79               | 35/66               | 89/115              | 20/14               | b***, e**, h***                                    |
| APOE $\epsilon$ 4-status (neg/pos) | 127/28              | 113/32              | 56/45               | 74/130              | 4/30                | b***, c***, d***, e***, f***, g***, h**, i***, j** |
| A $\beta$ Slopes $\pm$ SD          | 0.0032 $\pm$ 0.0094 | 0.0019 $\pm$ 0.0088 | 0.0112 $\pm$ 0.0162 | 0.0089 $\pm$ 0.0164 | 0.0095 $\pm$ 0.0183 | b***, c***, e***, f***, g*                         |

**Table legend.** Statistical comparisons between <sup>a</sup> A $\beta$ - CU and A $\beta$ - MCI; <sup>b</sup> A $\beta$ - CU and A $\beta$ + CU; <sup>c</sup> A $\beta$ - CU and A $\beta$ + MCI; <sup>d</sup> A $\beta$ - CU and AD; <sup>e</sup> A $\beta$ - MCI and A $\beta$ + CU; <sup>f</sup> A $\beta$ - MCI and A $\beta$ + MCI; <sup>g</sup> A $\beta$ - MCI and AD; <sup>h</sup> A $\beta$ + CU and A $\beta$ + MCI; <sup>i</sup> A $\beta$ + CU and AD; <sup>j</sup> A $\beta$ + MCI and AD. \* p < 0.05; \*\* p < 0.01; \*\*\* p < 0.001. A $\beta$ -  $\beta$  amyloid negative; A $\beta$ +  $\beta$  amyloid positive; AD – Alzheimer’s Disease dementia; CU – cognitively unimpaired; F – female; M – male; MCI – mild cognitive impairment; SD – standard deviation.

**Additional statistics:**

**Comparison to <sup>18</sup>F-Flortaucipir demographics (Main manuscript Table 1).**

Comparisons were performed within diagnostic groups (i.e. A $\beta$ - CU in the tau cohort versus A $\beta$ - CU in the A $\beta$  cohort etc.). Age: A $\beta$ - CU p<0.05; A $\beta$ + CU p<0.01. Sex: no significant differences. APOE  $\epsilon$ 4-status: AD p<0.05.

**Supplementary Table 6. Results of linear models for Tau-accumulation, PVE-corrected**

| Coefficient                     | Estimate $\pm$ SE    | T value       | P value              |
|---------------------------------|----------------------|---------------|----------------------|
| <b>Temporal meta-ROI</b>        |                      |               |                      |
| <i>APOE</i> $\epsilon$ 4 status | -0.0041 $\pm$ 0.011  | -0.374        | 0.708                |
| A $\beta$ Status                | 0.0430 $\pm$ 0.0138  | <b>3.100</b>  | <b>0.002 **</b>      |
| Age                             | -0.0015 $\pm$ 0.0006 | <b>-2.504</b> | <b>0.013 *</b>       |
| Sex                             | 0.0255 $\pm$ 0.0100  | <b>2.540</b>  | <b>0.011 *</b>       |
| Baseline tau                    | 0.0571 $\pm$ 0.0144  | <b>3.952</b>  | <b>&lt;0.001 ***</b> |
| Study Avid 05                   | 0.021 $\pm$ 0.013    | 1.597         | 0.111                |
| Study Exp 3                     | -0.008 $\pm$ 0.022   | -0.355        | 0.723                |
| Study BF1                       | 0.028 $\pm$ 0.017    | 1.659         | 0.098                |
| CU                              | 0.002 $\pm$ 0.022    | 0.088         | 0.930                |
| MCI                             | 0.012 $\pm$ 0.020    | 0.608         | 0.543                |
|                                 |                      |               |                      |
| <b>Neocortical ROI</b>          |                      |               |                      |
| <i>APOE</i> $\epsilon$ 4 status | -0.0017 $\pm$ 0.0080 | -0.216        | 0.829                |
| A $\beta$ Status                | 0.0199 $\pm$ 0.0101  | <b>1.968</b>  | <b>0.049 *</b>       |
| Age                             | -0.0005 $\pm$ 0.0005 | -1.202        | 0.230                |
| Sex                             | 0.0192 $\pm$ 0.0073  | <b>2.626</b>  | <b>0.009 **</b>      |
| Baseline tau                    | 0.0835 $\pm$ 0.0153  | <b>5.470</b>  | <b>&lt;0.001 ***</b> |
| Study Avid 05                   | 0.019 $\pm$ 0.010    | <b>1.977</b>  | <b>0.049 *</b>       |
| Study Exp 3                     | 0.008 $\pm$ 0.017    | 0.480         | 0.631                |
| Study BF1                       | 0.021 $\pm$ 0.012    | 1.722         | 0.086                |
| CU                              | -0.002 $\pm$ 0.015   | -0.136        | 0.891                |
| MCI                             | 0.004 $\pm$ 0.015    | 0.242         | 0.809                |

**Table legend.** Linear models were analyzed for each region using the slopes of tau accumulation. Statistical model: Tau slopes  $\sim$  *APOE*  $\epsilon$ 4 status + A $\beta$  status + Age + Sex + Study + Diagnosis + Baseline tau SUVR. CU – cognitively unimpaired; MCI – mild cognitive impairment; SE – standard error. \*  $p < 0.05$ ; \*\*  $p < 0.01$ ; \*\*\*  $p < 0.001$ .



**Supplementary Table 7. Results of linear model for Tau-accumulation in skull/meningeal “off-target ROI”**

| Coefficient           | Estimate ± SE    | T value       | P value              |
|-----------------------|------------------|---------------|----------------------|
| <b>Off-target ROI</b> |                  |               |                      |
| <i>APOE</i> ε4 status | 0.0105 ± 0.0060  | 1.740         | 0.083                |
| Aβ status             | -0.0077 ± 0.0062 | -1.253        | 0.211                |
| Age                   | 0.0002 ± 0.0004  | 0.492         | 0.623                |
| Sex                   | 0.0087 ± 0.0057  | 1.511         | 0.132                |
| Baseline retention    | -0.0912 ± 0.0214 | <b>-4.245</b> | <b>&lt;0.001 ***</b> |

**Table legend.** Linear models were analyzed for each region using the slopes of tau accumulation. Statistical model: Slope off-target ROI ~ *APOE* ε4 status + Aβ status + Age + Sex + Study + Baseline retention.

SE – standard error. \* p < 0.05.

**Supplementary Table 8. Results of linear model for Tau-accumulation in basal ganglia, putamen and globus pallidus**

| Coefficient                     | Estimate $\pm$ SE     | T value       | P value              |
|---------------------------------|-----------------------|---------------|----------------------|
| <b>Putamen</b>                  |                       |               |                      |
| <i>APOE</i> $\epsilon$ 4 status | -0.0093 $\pm$ 0.0078  | -1.192        | 0.233                |
| A $\beta$ status                | 0.0185 $\pm$ 0.0088   | <b>2.113</b>  | <b>0.035 *</b>       |
| Age                             | 0.0001 $\pm$ 0.0004   | 0.291         | 0.772                |
| Sex                             | 0.0032 $\pm$ 0.0071   | 0.455         | 0.650                |
| Baseline tau                    | -0.0525 $\pm$ 0.0205  | <b>-2.555</b> | <b>0.011 *</b>       |
| <b>Globus pallidus</b>          |                       |               |                      |
| <i>APOE</i> $\epsilon$ 4 status | -0.0138 $\pm$ 0.0087  | -1.595        | 0.111                |
| A $\beta$ status                | 0.0092 $\pm$ 0.0096   | 0.950         | 0.343                |
| Age                             | 0.0005 $\pm$ 0.0005   | 1.095         | 0.274                |
| Sex                             | 0.0065 $\pm$ 0.0079   | 0.815         | 0.416                |
| Baseline tau                    | -0.0743 $\pm$ 0.0205  | <b>-3.623</b> | <b>&lt;0.001 ***</b> |
| <b>Choroid plexus</b>           |                       |               |                      |
| <i>APOE</i> $\epsilon$ 4 status | -0.0060 $\pm$ 0.0079  | -0.764        | 0.445                |
| A $\beta$ status                | -0.0165 $\pm$ 0.0089  | -1.862        | 0.063                |
| Age                             | -0.00005 $\pm$ 0.0004 | -0.107        | 0.915                |
| Sex                             | 0.0012 $\pm$ 0.0072   | 0.170         | 0.865                |
| Baseline tau                    | -0.0441 $\pm$ 0.0151  | <b>-2.915</b> | <b>0.004 **</b>      |

**Table legend.** Linear models were analyzed for each region using the slopes of tau accumulation. Statistical model: Tau slopes  $\sim$  *APOE*  $\epsilon$ 4 status + A $\beta$  status + Age + Sex + Study + Diagnosis + Baseline tau SUVR. A $\beta$  -  $\beta$  amyloid; SE - standard error. \*  $p < 0.05$ ; \*\*  $p < 0.01$ ; \*\*\*  $p < 0.001$ .

**Supplementary Table 9. Results of linear model for Tau-accumulation in amygdala and precuneus/posterior cingulate ROIs**

| Coefficient                                              | Estimate ± SE    | T value       | P value              |
|----------------------------------------------------------|------------------|---------------|----------------------|
| <b>Amygdala</b>                                          |                  |               |                      |
| <i>APOE</i> ε4 status                                    | -0.0052 ± 0.0094 | -0.551        | 0.582                |
| Aβ status                                                | 0.0254 ± 0.0114  | <b>2.227</b>  | <b>0.027 *</b>       |
| Age                                                      | -0.0010 ± 0.0005 | <b>-2.054</b> | <b>0.041 *</b>       |
| Sex                                                      | 0.0276 ± 0.0083  | <b>3.313</b>  | <b>0.001 **</b>      |
| Baseline tau                                             | -0.0350 ± 0.0178 | -1.966        | 0.050                |
| <b>Precuneus/<br/>Posterior<br/>cingulate<br/>cortex</b> |                  |               |                      |
| <i>APOE</i> ε4 status                                    | -0.0085 ± 0.0084 | -1.011        | 0.312                |
| Aβ status                                                | 0.0270 ± 0.0105  | <b>2.581</b>  | <b>0.010 *</b>       |
| Age                                                      | -0.0007 ± 0.0005 | -1.404        | 0.161                |
| Sex                                                      | 0.0261 ± 0.0076  | <b>3.411</b>  | <b>&lt;0.001 ***</b> |
| Baseline tau                                             | 0.0701 ± 0.0137  | <b>5.129</b>  | <b>&lt;0.001 ***</b> |

**Table legend.** Linear models were analyzed for each region using the slopes of tau accumulation. Statistical model: Tau slopes ~ *APOE* ε4 status + Aβ status + Age + Sex + Study + Diagnosis + Baseline tau SUVR. Aβ - β amyloid; SE – standard error. \* p < 0.05; \*\* p < 0.01; \*\*\* p < 0.001.

**Supplementary Table 10. Results of linear model for A $\beta$  accumulation in ADNI**

| Coefficient                     | Estimate $\pm$ SE     | T value      | P value              |
|---------------------------------|-----------------------|--------------|----------------------|
| <b>Neocortical composite</b>    |                       |              |                      |
| <i>APOE</i> $\epsilon$ 4 status | 0.0024 $\pm$ 0.0012   | <b>1.980</b> | <b>0.0482 *</b>      |
| A $\beta$ status                | 0.0057 $\pm$ 0.0012   | <b>4.818</b> | <b>&lt;0.001 ***</b> |
| Age                             | 0.00019 $\pm$ 0.00008 | <b>2.445</b> | <b>0.0148 *</b>      |
| Sex                             | 0.00075 $\pm$ 0.0011  | 0.692        | 0.4894               |

Statistical model: A $\beta$  Slope  $\sim$  *APOE*  $\epsilon$ 4 status + A $\beta$  status + Age + Sex. SE – standard error. \* p < 0.05; \*\* p < 0.01; \*\*\* p < 0.001.

## SUPPLEMENTARY FIGURES

### Supplementary Figure 1

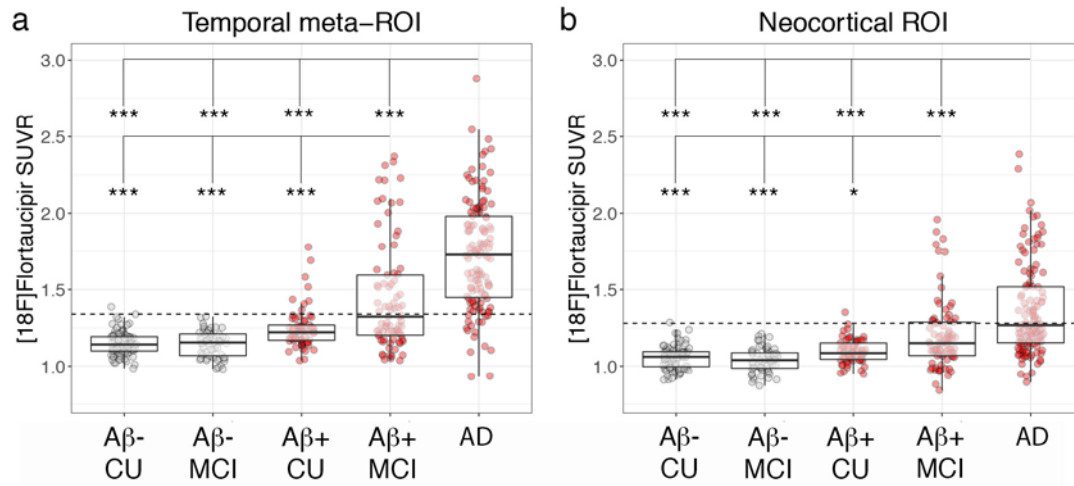

#### Baseline $^{18}\text{F}$ -Flortaucipir SUVRs.

Baseline  $^{18}\text{F}$ -Flortaucipir SUVRs in a) the temporal meta-region SUVRs, b) the neocortex meta-ROI. Red dots indicate A $\beta$ + participants; grey dots indicate A $\beta$ - participants. AD – Alzheimer’s Disease Dementia; CU – cognitively unimpaired; MCI – mild cognitive impairment; SUVR – standardized uptake value ratio. Boxplots depict median value and the interquartile range.

## Supplementary Figure 2

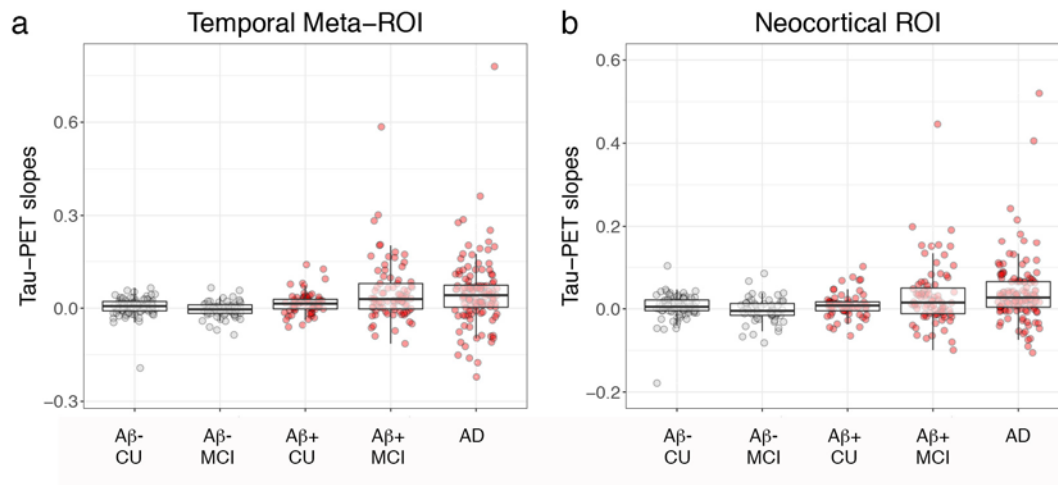

### $^{18}\text{F}$ -Flortaucipir slopes, full range y-axes.

$^{18}\text{F}$ -Flortaucipir SUVR/year slopes in a) the temporal meta-ROI, b) the neocortical ROI.

Boxplots depict median value and the interquartile ranges. Red dots indicate  $\text{A}\beta^+$ ; grey dots indicate  $\text{A}\beta^-$ . AD – Alzheimer's Disease Dementia; CU – cognitively unimpaired; MCI – mild cognitive impairment; SUVR – standardized uptake value ratio.

### Supplementary Figure 3

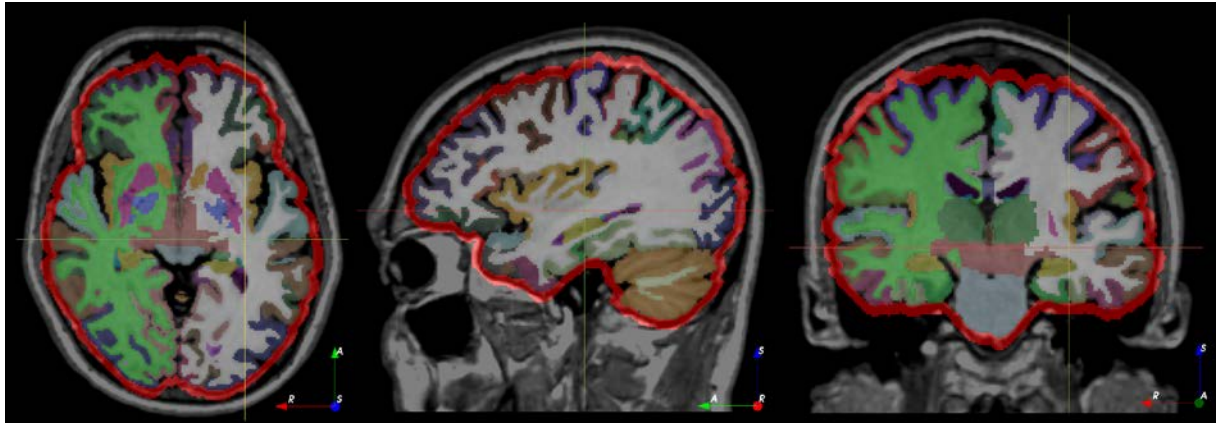

#### **Creating an off-target ROI for skull/meninges.**

Supplementary Figure 3 shows an example of the off-target ROI used to control for binding in meninges and skull. The ROI was created as detailed in the eMethods section. The aim was to capture possible off-target binding in structures overlying the cortex and possibly influencing the cortical signal.

## Supplementary Figure 4

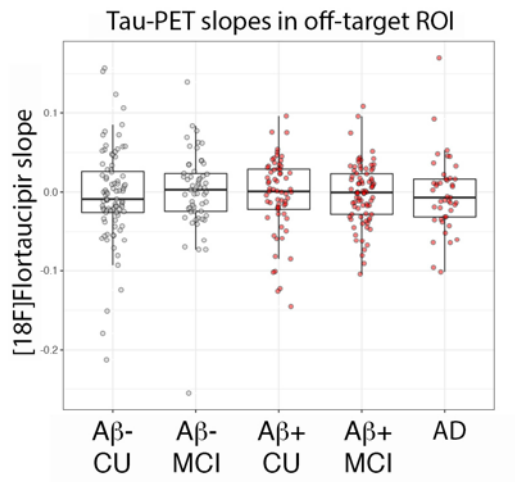

### <sup>18</sup>F-Flortaucipir slopes in off-target ROI.

Tau PET slopes in off-target (skull/meningeal) ROI adjusted for within brain signal across diagnostic groups. Red dots indicate Aβ+; grey dots indicate Aβ-. AD – Alzheimer’s Disease Dementia; CU – cognitively unimpaired; MCI – mild cognitive impairment.
